# Supplementary material for: Na2CO3-modified CaO-based CO2 sorbents: the effects of structure and morphology on CO2 uptake
Source: Royal Society of Chemistry journal article supplement (doi:10.1039/d0cp04410e), 2020-01-01
Supplement: d0cp04410e1.pdf [file d0cp04410e1.pdf]

## Supporting Information

### **Na<sub>2</sub>CO<sub>3</sub>-modified CaO-based CO<sub>2</sub> Sorbents: The Effects of Structure and Morphology on CO<sub>2</sub> Uptake**

Alexey Kurlov,<sup>a</sup> Agnieszka M. Kierzkowska,<sup>a</sup> Thomas Huthwelker,<sup>b</sup> Paula M. Abdala,<sup>\*a</sup> and Christoph R. Müller<sup>\*a</sup>

<sup>a</sup> ETH Zürich, Laboratory of Energy Science and Engineering, Leonhardstrasse 21, CH 8092 Zürich, Switzerland

<sup>b</sup> PSI, SLS, 5232 Villigen, Switzerland

e-mail:\* [abdalap@ethz.ch](mailto:abdalap@ethz.ch); [muelchri@ethz.ch](mailto:muelchri@ethz.ch)

## List of Figures

|                                                                                                                                                                                                                                                                                                                                                                                                                                                                                                                                                                                                                                           |    |
|-------------------------------------------------------------------------------------------------------------------------------------------------------------------------------------------------------------------------------------------------------------------------------------------------------------------------------------------------------------------------------------------------------------------------------------------------------------------------------------------------------------------------------------------------------------------------------------------------------------------------------------------|----|
| Figure S1. SEM images of the $\text{CaCO}_3$ and $\text{Na}_2\text{CO}_3$ precursors. ....                                                                                                                                                                                                                                                                                                                                                                                                                                                                                                                                                | 3  |
| Figure S2. XRD patterns of as prepared CaO-based sorbents. ....                                                                                                                                                                                                                                                                                                                                                                                                                                                                                                                                                                           | 3  |
| Figure S3. SEM images of the as prepared sorbents, i.e. Ca/0Na, Ca/1Na, Ca/3Na, Ca/6Na, Ca/10Na, and Ca/20Na. ....                                                                                                                                                                                                                                                                                                                                                                                                                                                                                                                        | 4  |
| Figure S4. SEM/EDX elemental mapping of Ca/3Na. ....                                                                                                                                                                                                                                                                                                                                                                                                                                                                                                                                                                                      | 5  |
| Figure S5. BET surface area and BJH pore volume of CaO-based sorbents in the as-prepared (prior to the initial calcination) and calcined states as a function of the $\text{Na}_2\text{CO}_3$ content. ....                                                                                                                                                                                                                                                                                                                                                                                                                               | 5  |
| Figure S6. $\text{CO}_2$ uptake profile of Ca/1Na, Ca/3Na, Ca/10Na, and Ca/20Na revealing a weight difference, $\Delta m$ , when the sorbent is calcined in pure $\text{N}_2$ or a $\text{CO}_2$ -rich atmosphere. ....                                                                                                                                                                                                                                                                                                                                                                                                                   | 6  |
| Figure S7. TPC profiles of $\text{CaCO}_3$ , $\text{Na}_2\text{CO}_3$ , Ca/1Na and Ca/20Na. ....                                                                                                                                                                                                                                                                                                                                                                                                                                                                                                                                          | 7  |
| Figure S8. Increase in particle size of $\text{CaCO}_3$ (red) and Ca/1Na (black) during the initial calcination step in $\text{N}_2$ as a function of the calcination temperature. ....                                                                                                                                                                                                                                                                                                                                                                                                                                                   | 7  |
| Figure S9. SEM images of $\text{CaCO}_3$ annealed at 750 °C in $\text{CO}_2$ for a) 0 h, b) 1 h, c) 5 h and d) 12 h. ....                                                                                                                                                                                                                                                                                                                                                                                                                                                                                                                 | 8  |
| Figure S10. Surface area and pore volume of $\text{CaCO}_3$ in the as-prepared (prior to the initial calcination) and calcined states as a function of sintering time. ....                                                                                                                                                                                                                                                                                                                                                                                                                                                               | 8  |
| Figure S11. Cyclic $\text{CO}_2$ uptake of ball-milled $\text{CaCO}_3$ that has been exposed prior to $\text{CO}_2$ uptake test to sintering conditions for varying durations (sintering temperature 750 °C in pure $\text{CO}_2$ atmosphere) under realistic $\text{CO}_2$ capture conditions (calcination at 900 °C in a $\text{CO}_2$ -rich atmosphere; carbonation at 650 °C in 20 vol.% $\text{CO}_2/\text{N}_2$ ). Abbreviations 1 h, 5 h and 12 h in the legend correspond to the samples which were preliminary annealed at 750 °C in $\text{CO}_2$ for 1 h, 5 h and 12 h, respectively (as described in Figures S6 and S7). .... | 9  |
| Figure S12. SEM images and EDX elemental mapping of Ca/3Na after the 10 <sup>th</sup> carbonation step. ....                                                                                                                                                                                                                                                                                                                                                                                                                                                                                                                              | 9  |
| Figure S13. Ca K-edge spectra of Ca/1Na and Ca/20Na at different states, i.e. as prepared, after the initial calcination (_calc.) and after the 10 <sup>th</sup> carbonation step (_10c_carb.) compared to the reference spectra of CaO and $\text{CaCO}_3$ . ....                                                                                                                                                                                                                                                                                                                                                                        | 10 |
| Figure S14. Na K-edge spectra of $\text{Na}_2\text{CO}_3$ -modified CaO after initial calcination (800 °C, $\text{N}_2$ ) compared to the reference spectra of $\text{NaCO}_3$ . ....                                                                                                                                                                                                                                                                                                                                                                                                                                                     | 11 |
| Figure S15. XRD pattern of the $\text{Na}_2\text{Ca}(\text{CO}_3)_2$ reference and the simulated pattern according to the ICSD database. ....                                                                                                                                                                                                                                                                                                                                                                                                                                                                                             | 11 |
| Figure S16. TGA data when the reference $\text{Na}_2\text{Ca}(\text{CO}_3)_2$ is exposed to cyclic carbonation calcination conditions. $\text{Na}_2\text{Ca}(\text{CO}_3)_2$ does not decompose under the carbonation and calcination conditions studied ( $\text{CO}_2$ , 650–900 °C). ....                                                                                                                                                                                                                                                                                                                                              | 12 |

## List of Tables

|                                                                                                           |    |
|-----------------------------------------------------------------------------------------------------------|----|
| Table S1. Theoretical and ICP-determined $\text{Na}_2\text{CO}_3$ contents in the prepared sorbents. .... | 12 |
|-----------------------------------------------------------------------------------------------------------|----|

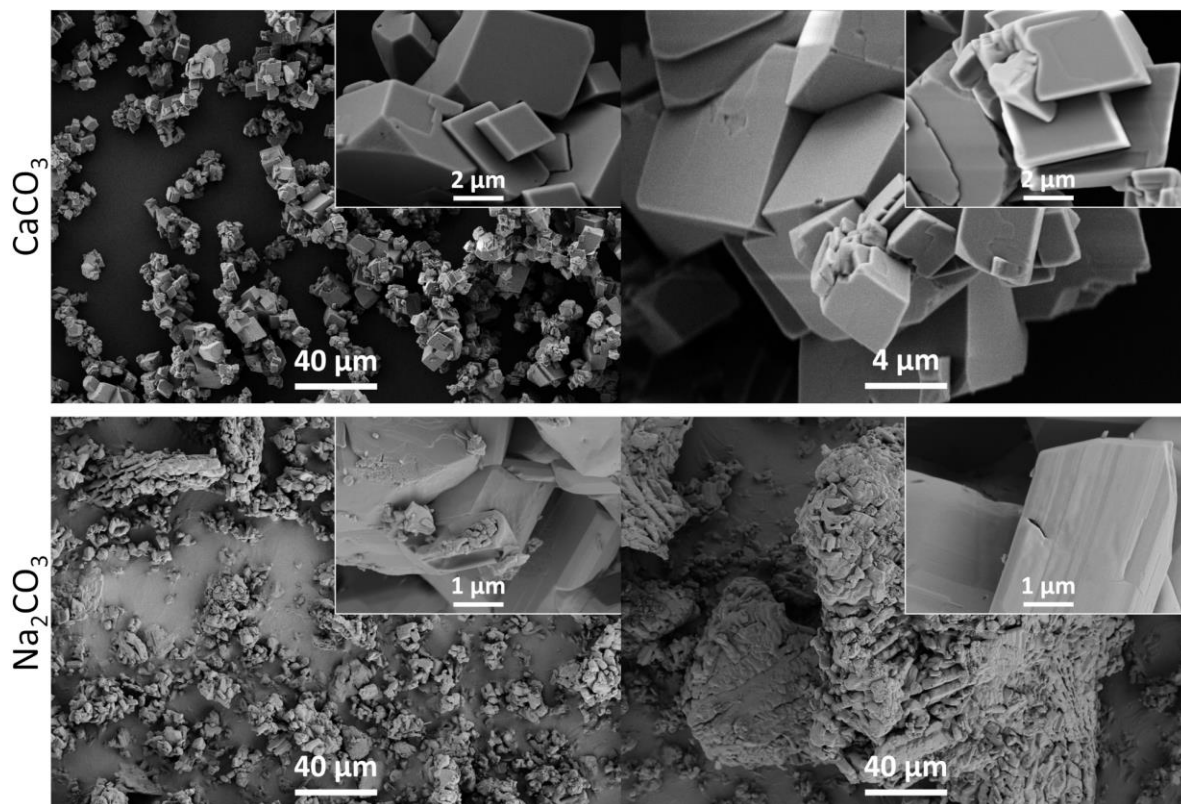

**Figure S1.** SEM images of the  $\text{CaCO}_3$  and  $\text{Na}_2\text{CO}_3$  precursors.

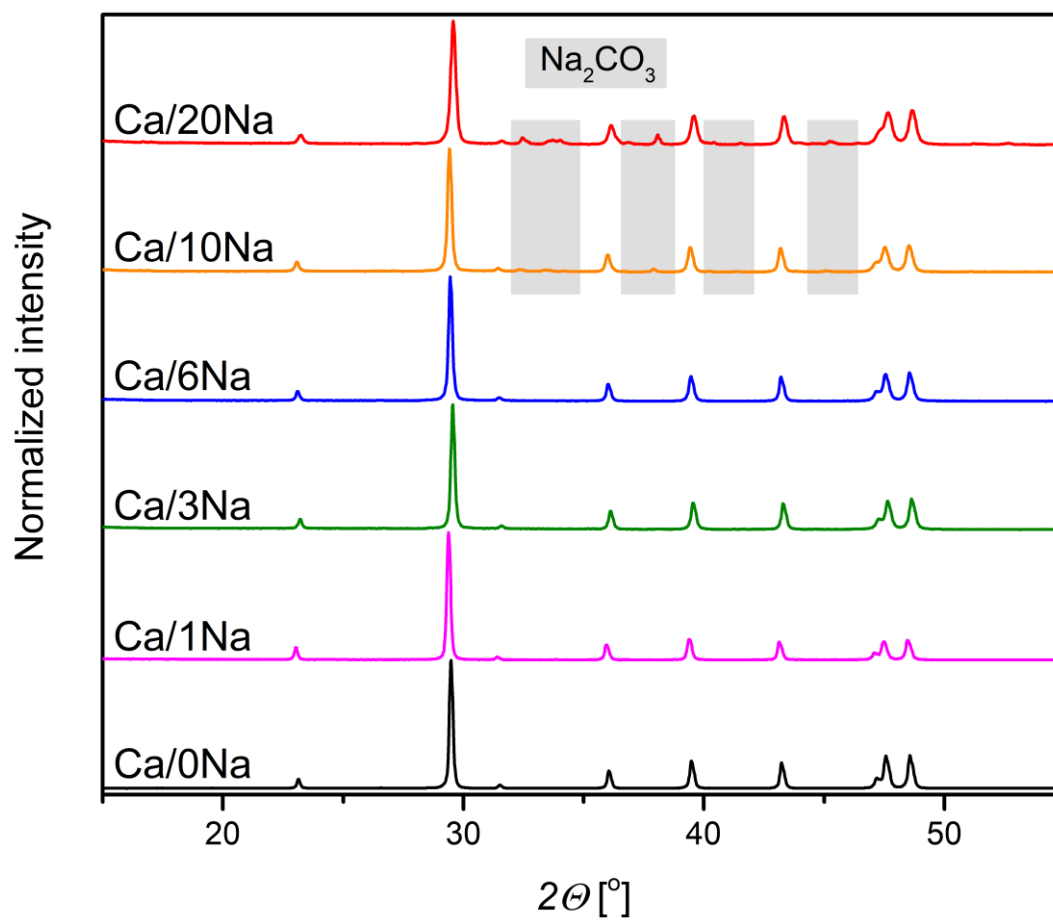

**Figure S2.** XRD patterns of as prepared CaO-based sorbents.

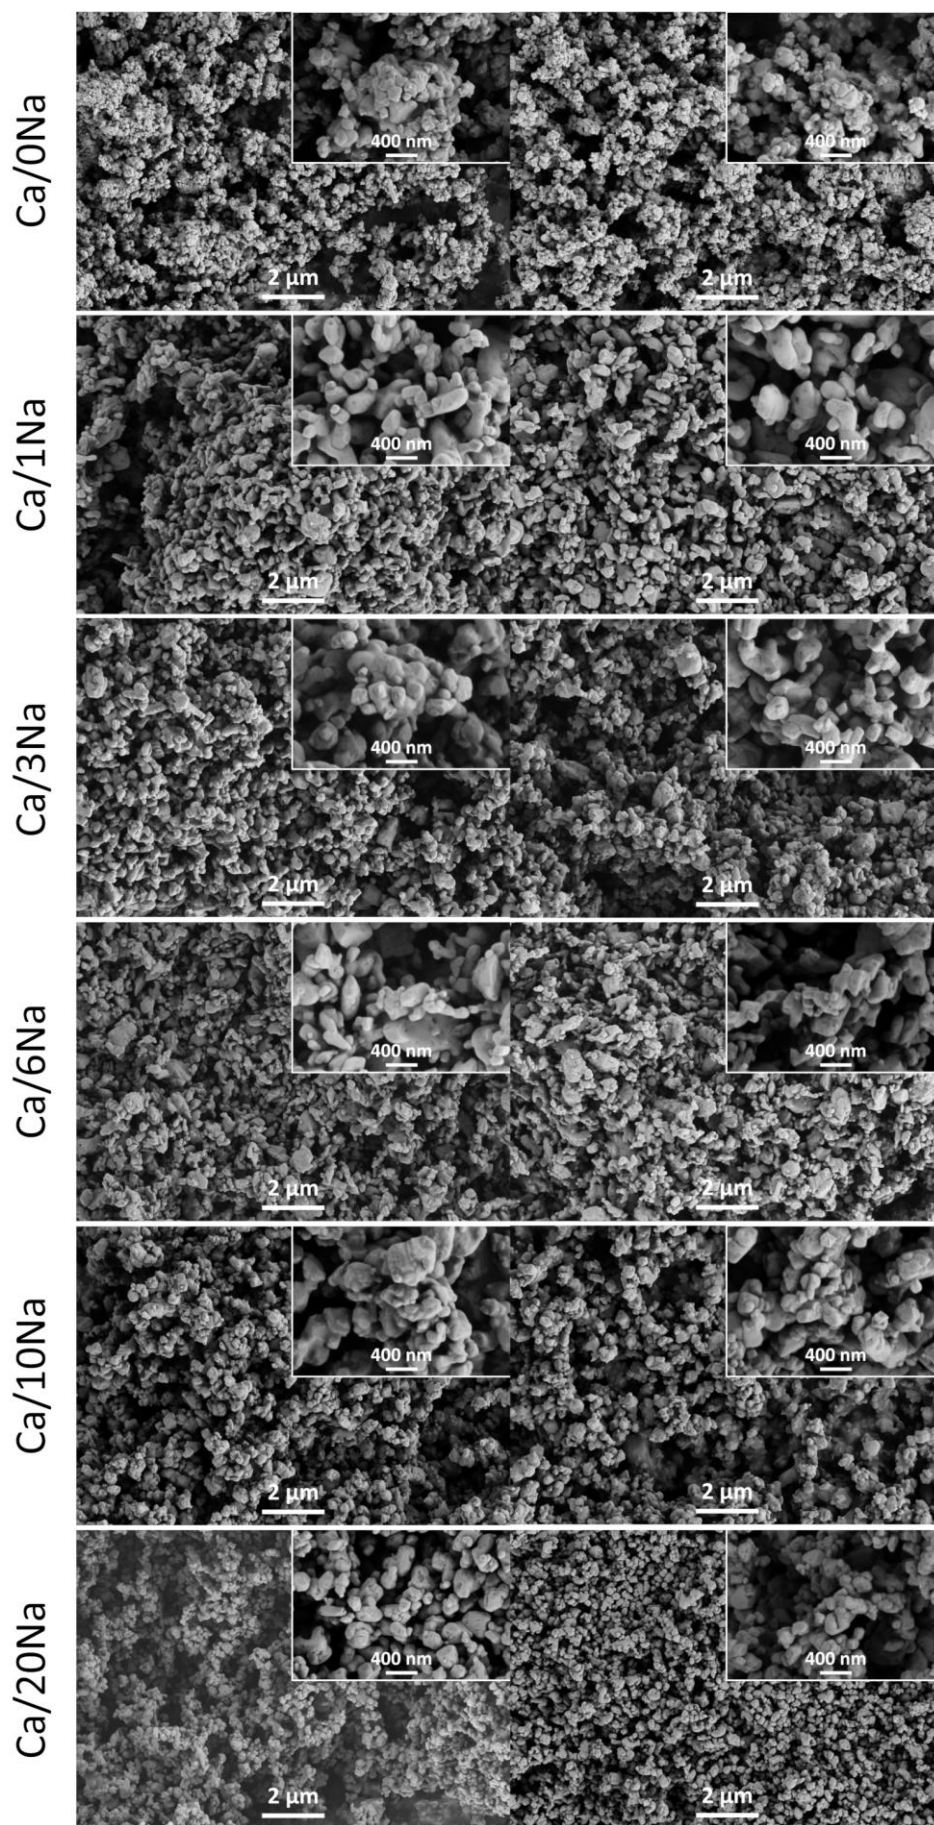

**Figure S3.** SEM images of the as prepared sorbents, i.e. Ca/0Na, Ca/1Na, Ca/3Na, Ca/6Na, Ca/10Na, and Ca/20Na.

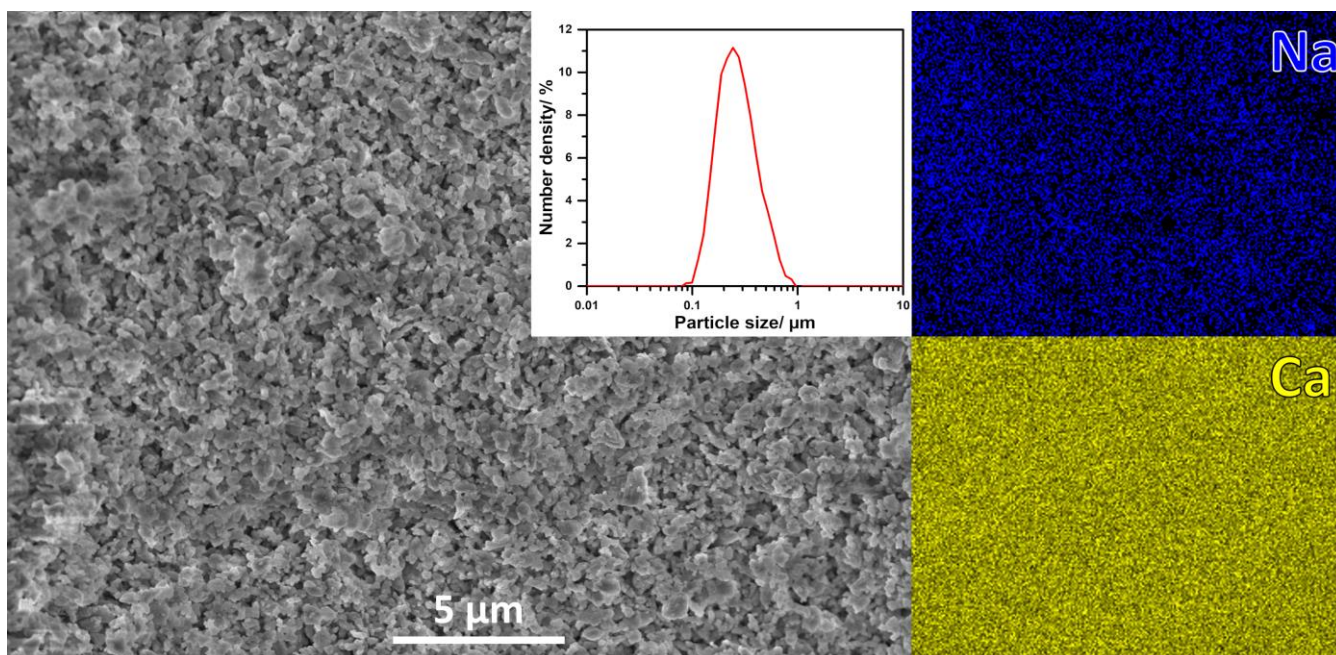

**Figure S4.** SEM/EDX elemental mapping of Ca/3Na.

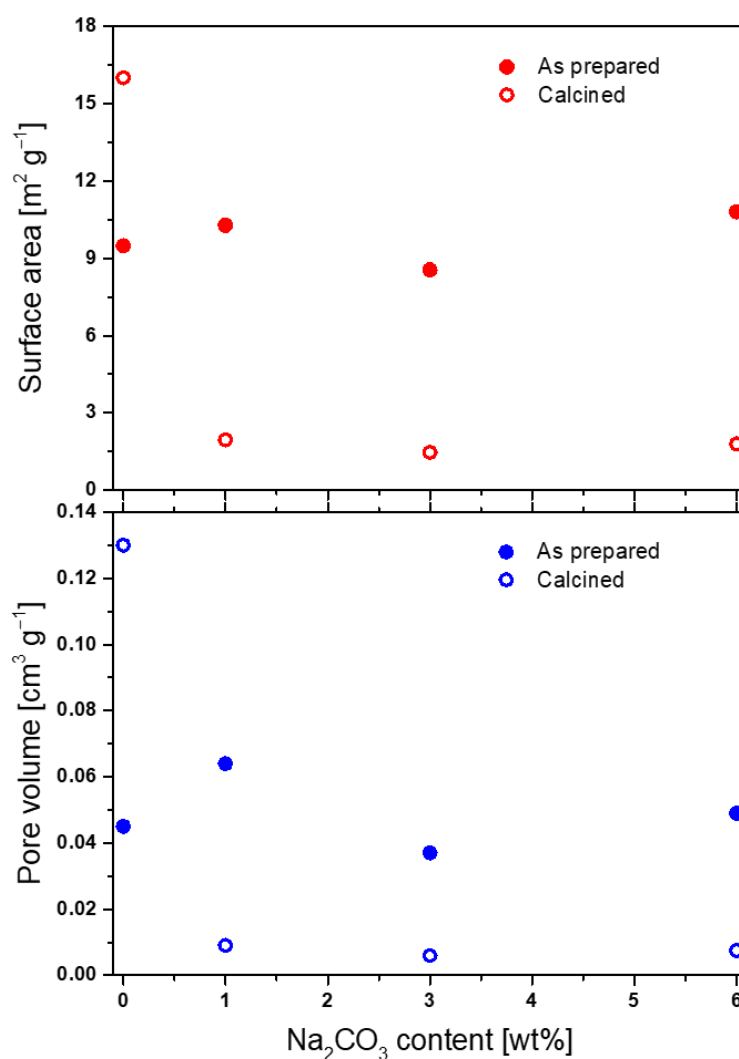

**Figure S5.** BET surface area and BJH pore volume of CaO-based sorbents in the as-prepared (prior to the initial calcination) and calcined states as a function of the  $\text{Na}_2\text{CO}_3$  content.

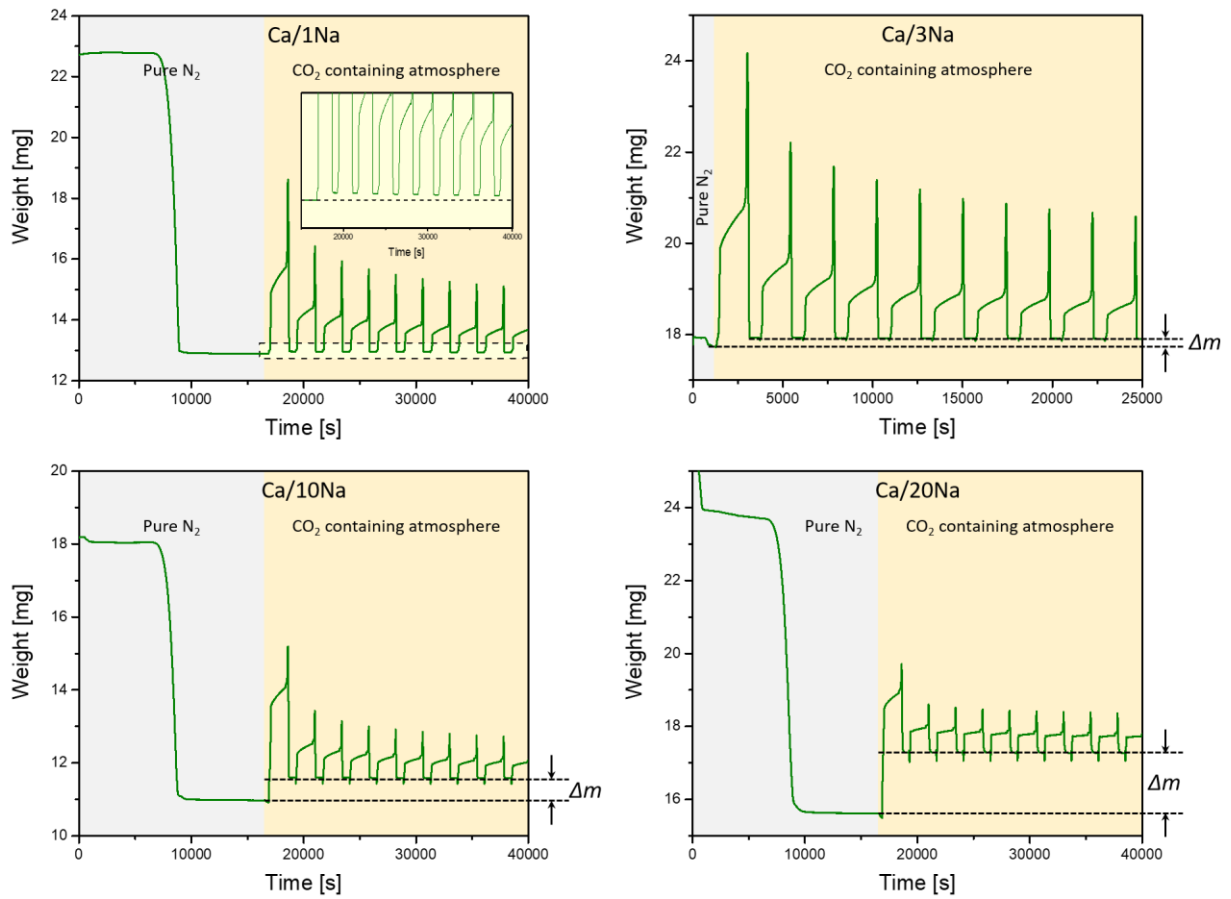

**Figure S6.** CO<sub>2</sub> uptake profile of Ca/1Na, Ca/3Na, Ca/10Na, and Ca/20Na revealing a weight difference,  $\Delta m$ , when the sorbent is calcined in pure N<sub>2</sub> or a CO<sub>2</sub>-rich atmosphere.

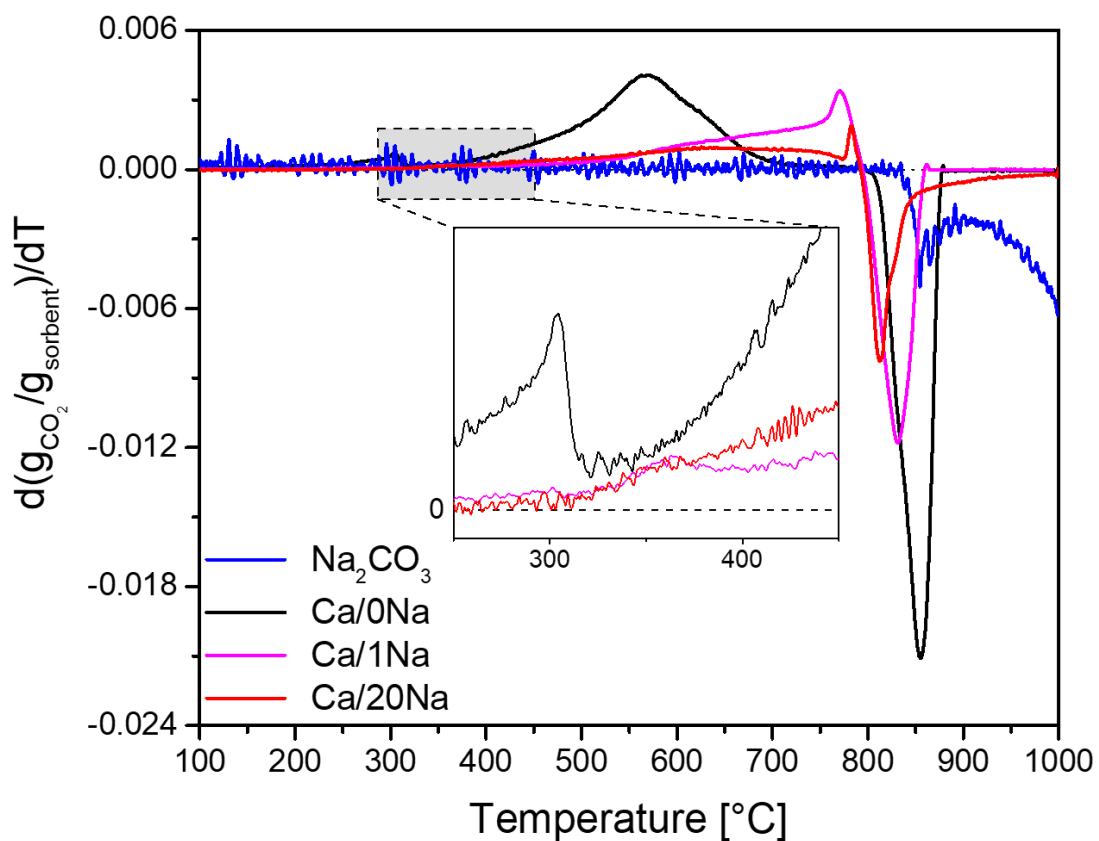

Figure S7. TPC profiles of CaCO<sub>3</sub>, Na<sub>2</sub>CO<sub>3</sub>, Ca/1Na and Ca/20Na.

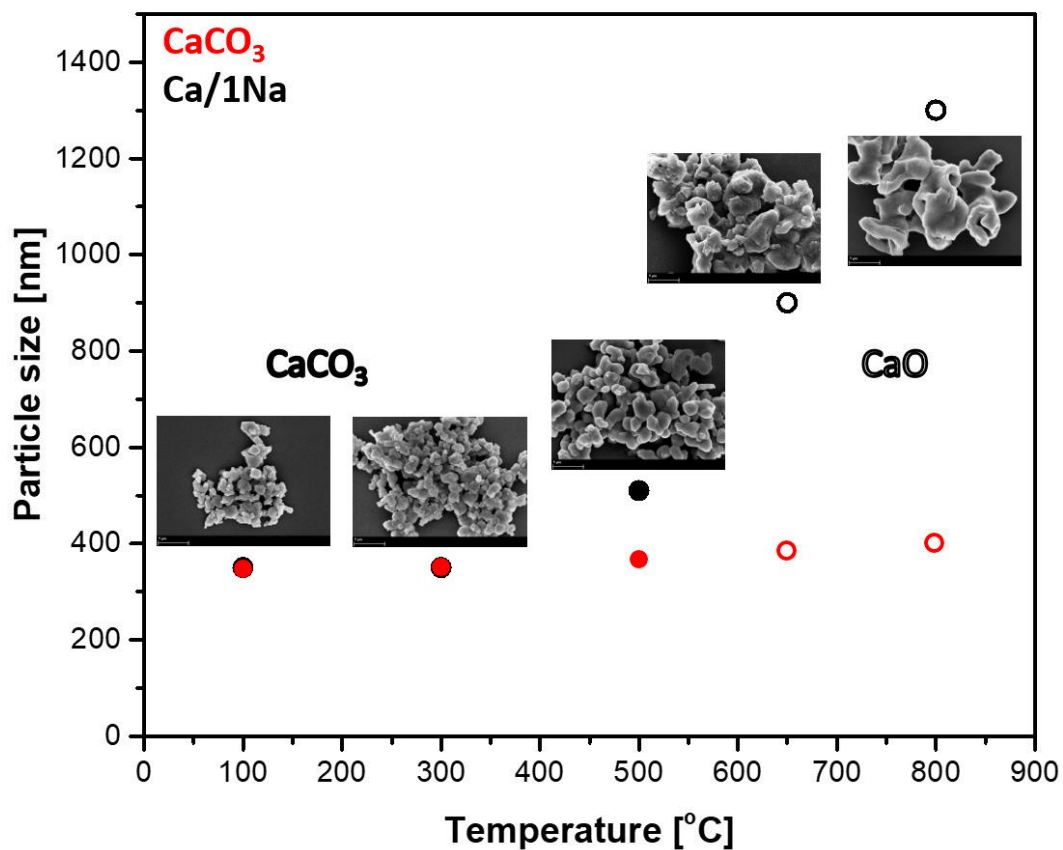

Figure S8. Increase in particle size of CaCO<sub>3</sub> (red) and Ca/1Na (black) during the initial calcination step in N<sub>2</sub> as a function of the calcination temperature.

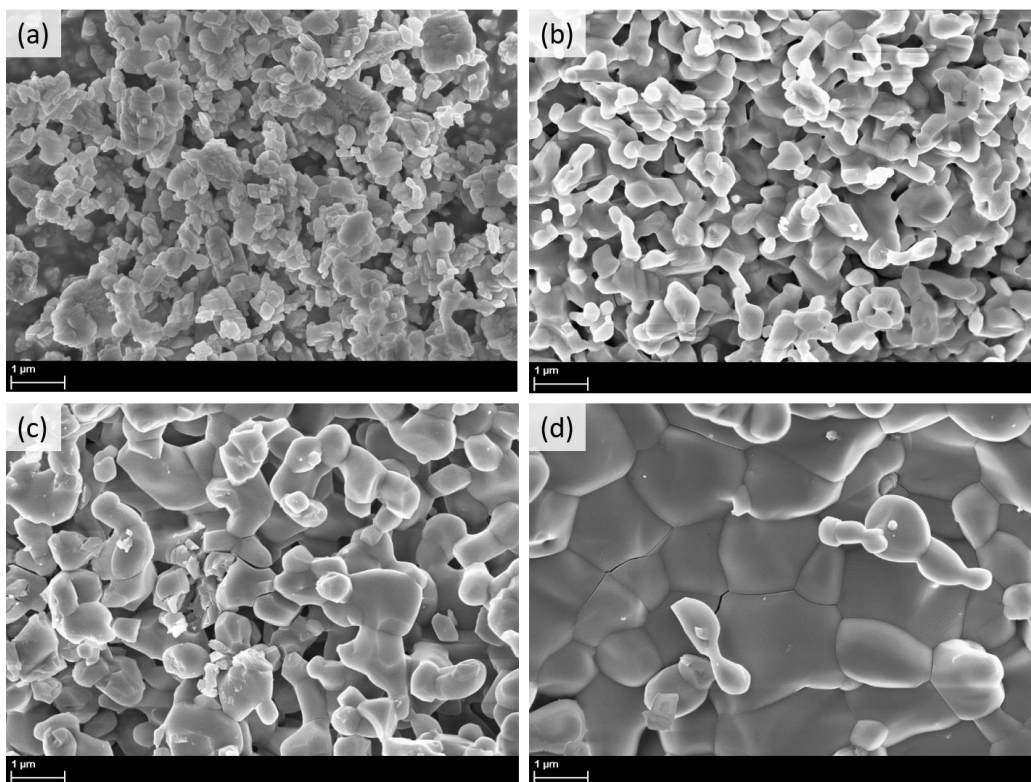

**Figure S9.** SEM images of  $\text{CaCO}_3$  annealed at  $750\text{ }^\circ\text{C}$  in  $\text{CO}_2$  for a) 0 h, b) 1 h, c) 5 h and d) 12 h.

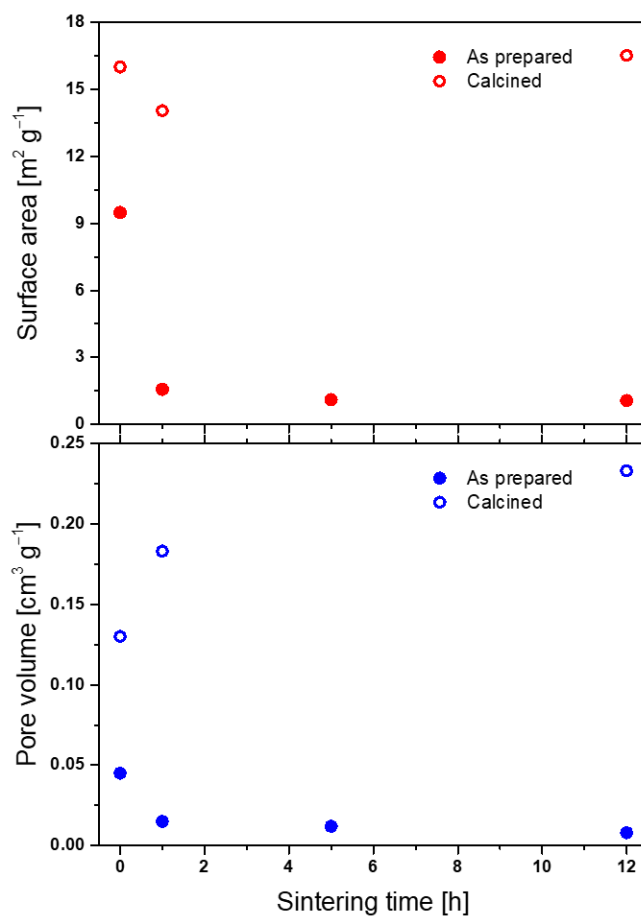

**Figure S10.** Surface area and pore volume of  $\text{CaCO}_3$  in the as-prepared (prior to the initial calcination) and calcined states as a function of sintering time.



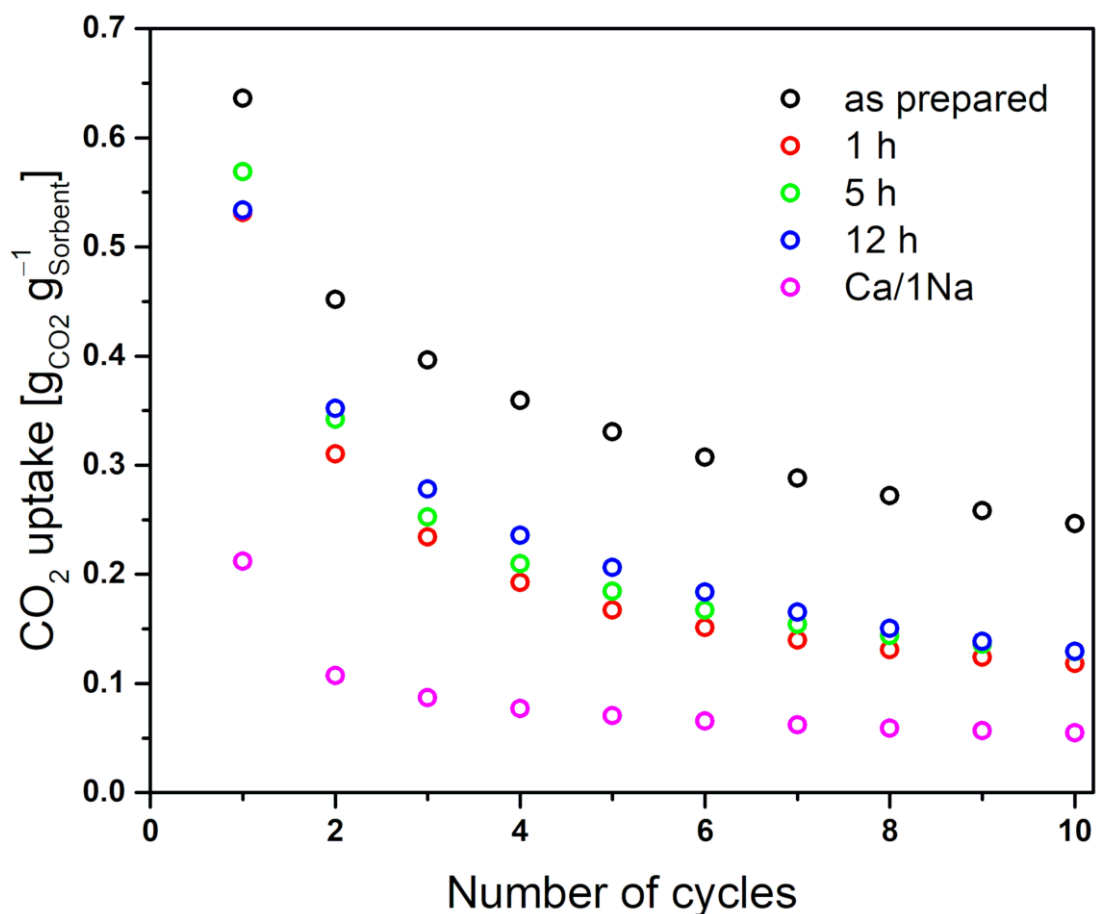

**Figure S11.** Cyclic CO<sub>2</sub> uptake of ball-milled CaCO<sub>3</sub> that has been exposed prior to CO<sub>2</sub> uptake test to sintering conditions for varying durations (sintering temperature 750 °C in pure CO<sub>2</sub> atmosphere) under realistic CO<sub>2</sub> capture conditions (calcination at 900 °C in a CO<sub>2</sub>-rich atmosphere; carbonation at 650 °C in 20 vol.% CO<sub>2</sub>/N<sub>2</sub>). Abbreviations 1 h, 5 h and 12 h in the legend correspond to the samples which have been annealed at 750 °C in CO<sub>2</sub> for 1 h, 5 h and 12 h, respectively (as described in Figures S9 and S10).

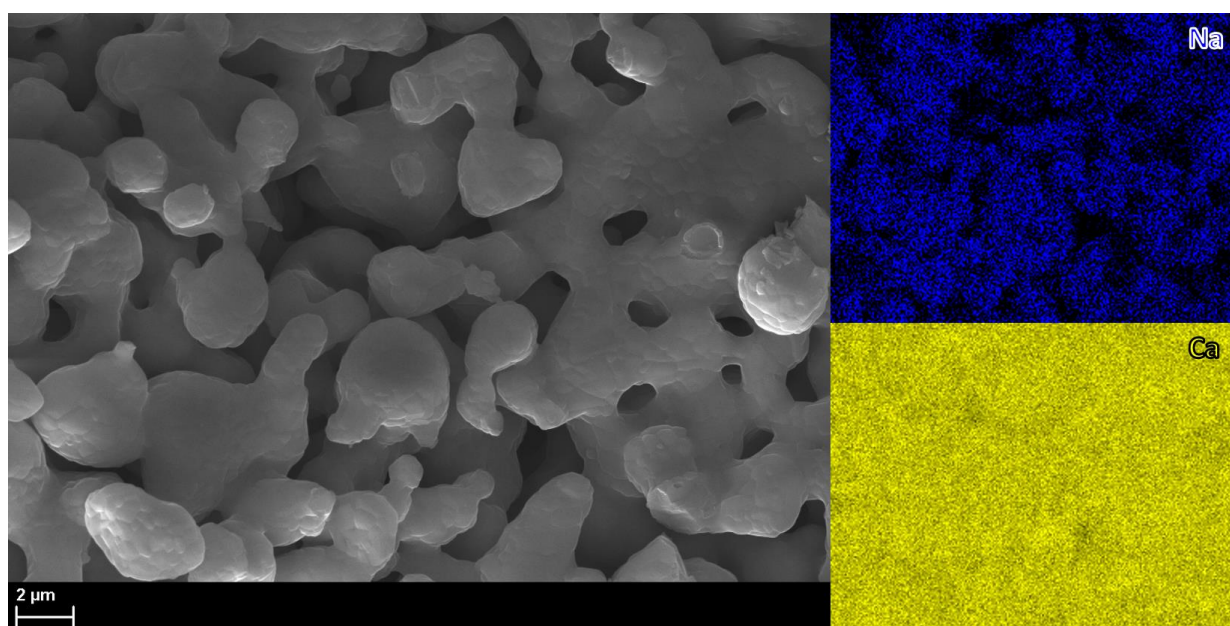

**Figure S12.** SEM images and EDX elemental mapping of Ca/3Na after the 10<sup>th</sup> carbonation step.

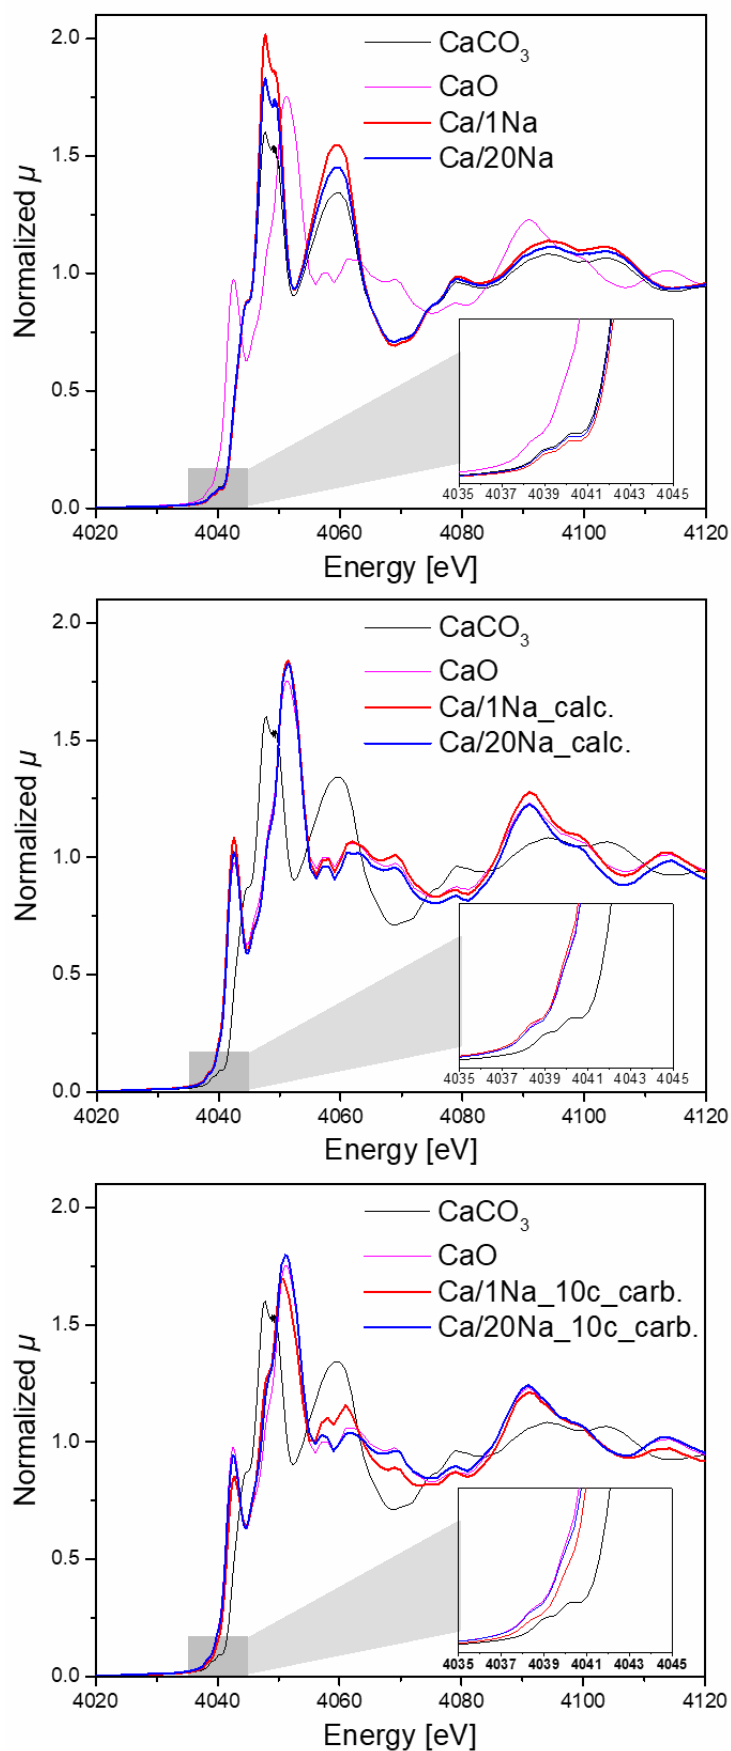

**Figure S13.** Ca K-edge spectra of Ca/1Na and Ca/20Na at different states, i.e. as prepared, after the initial calcination (`_calc.`) and after the 10<sup>th</sup> carbonation step (`_10c_carb.`) compared to the reference spectra of CaO and  $\text{CaCO}_3$ .

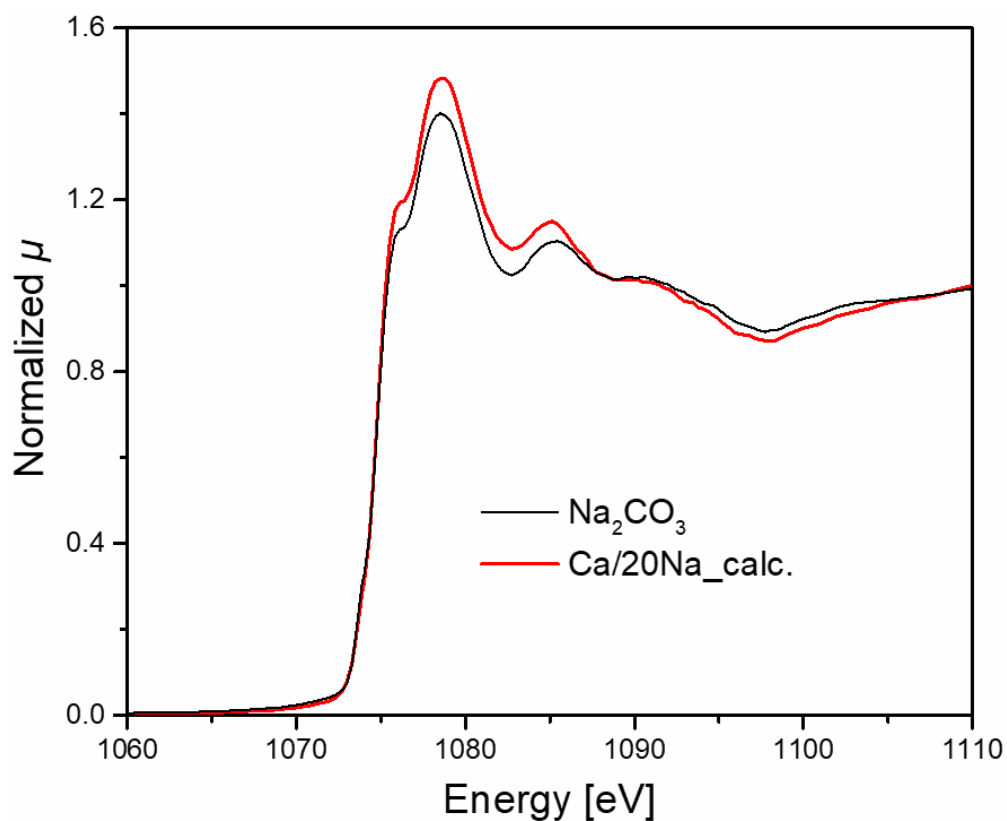

**Figure S14.** Na K-edge spectra of  $\text{Na}_2\text{CO}_3$ -modified CaO after initial calcination (800 °C,  $\text{N}_2$ ) compared to the reference spectra of  $\text{NaCO}_3$ .

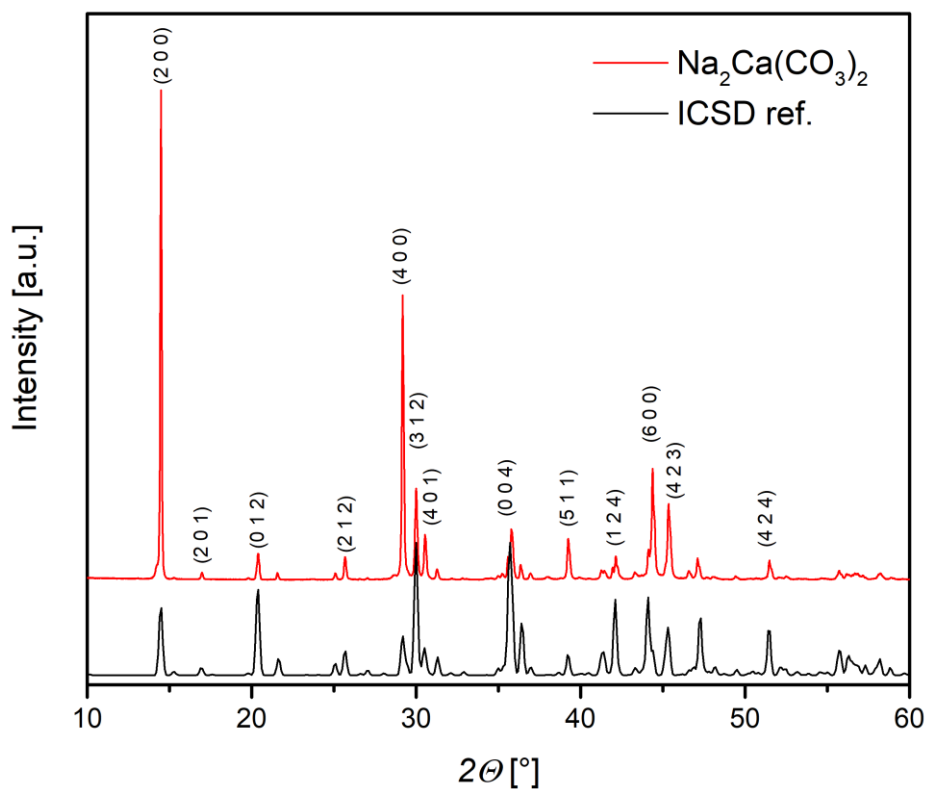

**Figure S15.** XRD pattern of the  $\text{Na}_2\text{Ca}(\text{CO}_3)_2$  reference and the simulated pattern according to the ICSD database, crystal structure reported in *Cryst. Growth Des.* **2016**, 16, 1893–1902 ( $P2_1ca$ ,  $a = 10.0713 \text{ \AA}$ ,  $b = 8.7220 \text{ \AA}$ ,  $c = 12.2460 \text{ \AA}$ ).

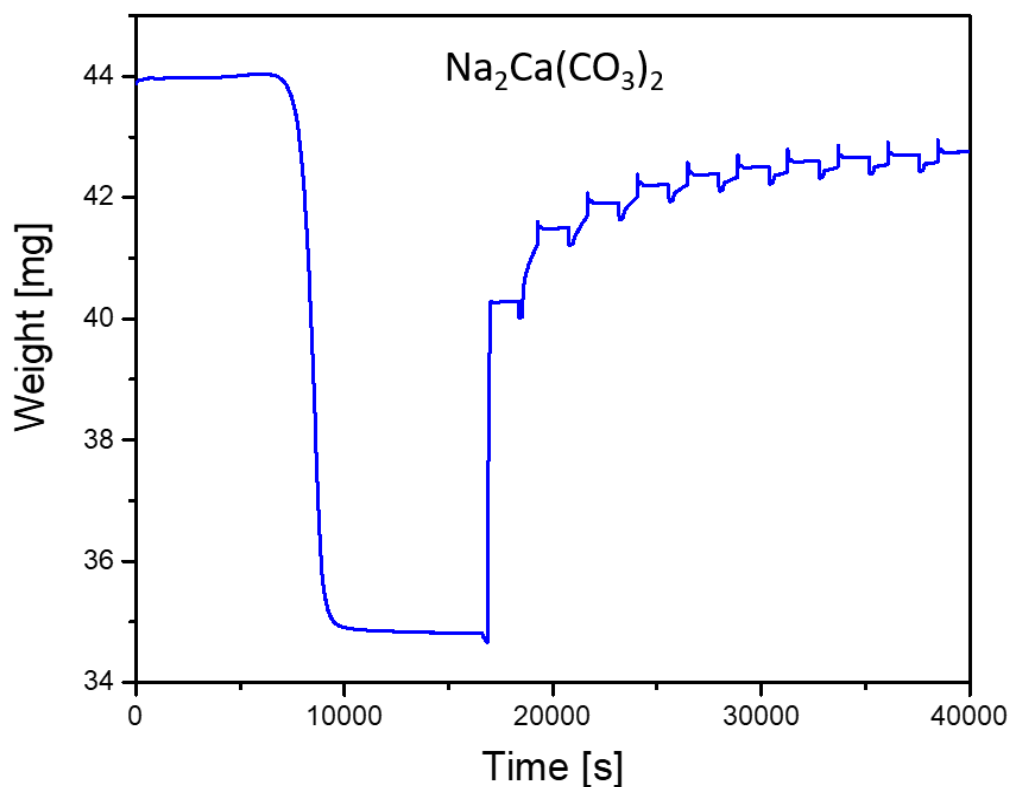

**Figure S16.** TGA data when the reference  $\text{Na}_2\text{Ca}(\text{CO}_3)_2$  is exposed to cyclic carbonation calcination conditions.  $\text{Na}_2\text{Ca}(\text{CO}_3)_2$  does not decompose under the carbonation and calcination conditions studied ( $\text{CO}_2$ , 650–900 °C).

**Table S1.** Theoretical and ICP-determined  $\text{Na}_2\text{CO}_3$  contents in the prepared sorbents.

| Sample  | Nominal $\text{Na}_2\text{CO}_3$ content wt.% | Na/Ca ratio | Determined $\text{Na}_2\text{CO}_3$ content wt.% |
|---------|-----------------------------------------------|-------------|--------------------------------------------------|
| Ca/1Na  | 1                                             | 0.009       | 0.8                                              |
| Ca/3Na  | 3                                             | 0.057       | 5                                                |
| Ca/10Na | 10                                            | 0.130       | 10.7                                             |
| Ca/20Na | 20                                            | 0.301       | 21.7                                             |
